# Supplementary material for: Insights into the Diversity of Secondary Metabolites of Planktothrix Using a Biphasic Approach Combining Global Genomics and Metabolomics
Source: Preprints.org preprint supplement (doi:10.20944/preprints201906.0310.v1), 2019-06-30

**Supplementary table S1.** Main characteristics of the 4 *Planktothrix* strains .

| <i>Planktothrix</i> strains | PCC 7805                       | PCC 10110                 | PCC 7821            | NIVA CYA 126-8     |
|-----------------------------|--------------------------------|---------------------------|---------------------|--------------------|
| Previously named            | <i>P. agardhii</i>             | <i>P. agardhii</i>        | <i>P. rubescens</i> | <i>P. agardhii</i> |
| Phenotype (color)           | Green                          | Green                     | Red                 | Green              |
| Major phycobiliprotein      | Phycocyanin                    | Phycocyanin               | Phycoerythrin       | Phycocyanin        |
| Microcystin synthesis       | ✗                              | ✓                         | ✓                   | ✓                  |
| Habitat                     | Planktic                       | Planktic                  | Planktic            | Planktic           |
| Origin                      | Temperate lake,<br>Netherlands | Temperate<br>lake, France | Nordic lake         | Nordic lake        |

**Supplementary figure S1.** Clustering of the of *Planktothrix* visualized on the MicroScope platform (<http://www.genoscope.cns.fr/agc/microscope>). The genomic similarity is estimated using Mash, a software that computes a distance between two genomes. From all the pairwise distances of the genomes set, a tree is construct dynamically using the neighbor-joining javascript package. The tree displays clustering annotations. This clustering has been computed from all-pairs distances  $\leq 0.06$  ( $\approx 94\%$  ANI) that correspond to the ANI standard to define a species group.

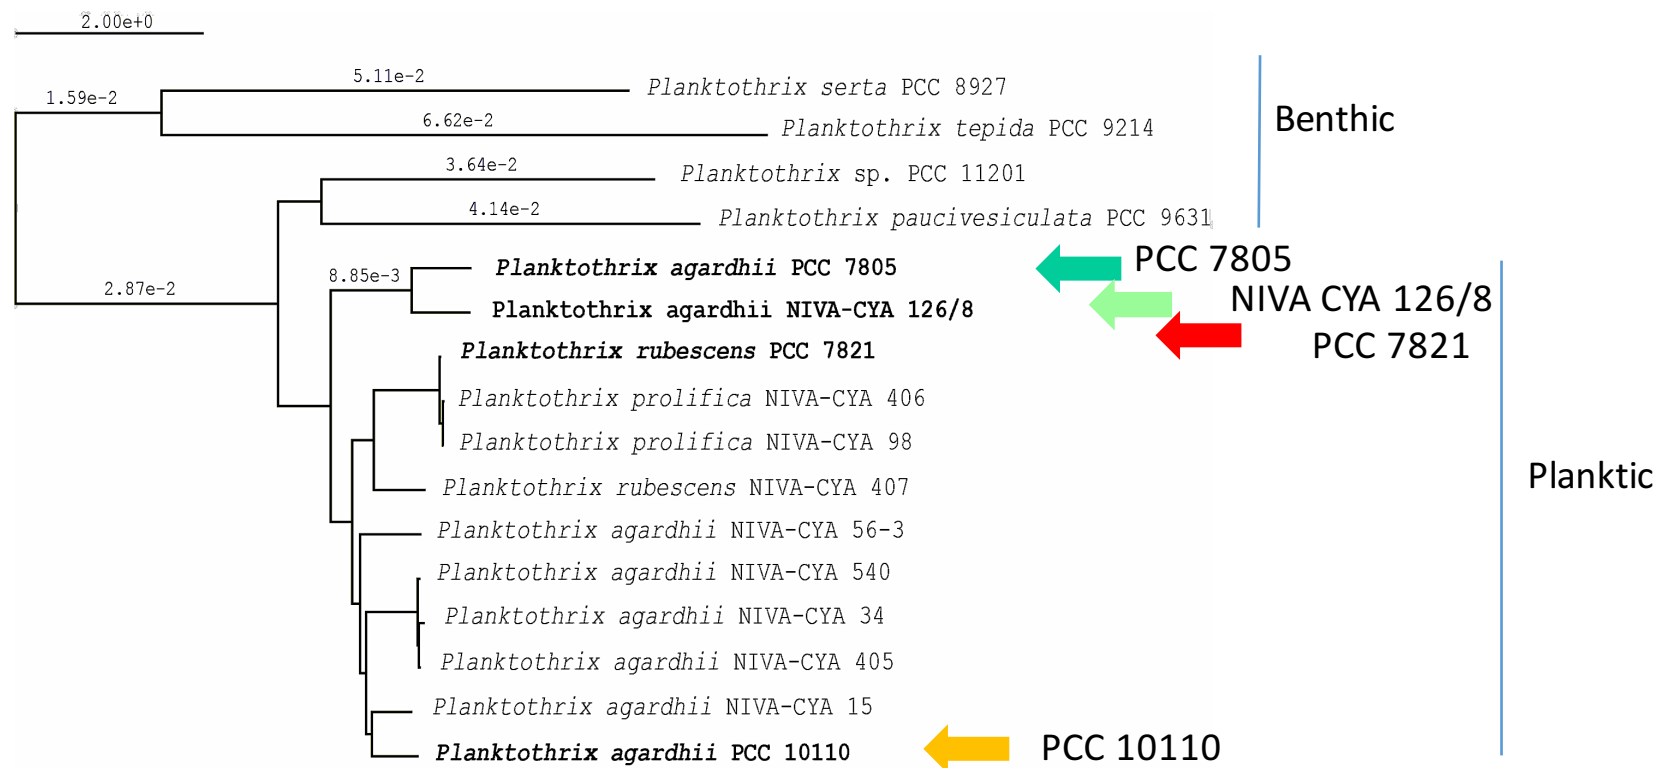

**Supplementary figure S2.** Venn diagram of the pan-genomes (determining the common part = core-genome, or variable portion of the genome = variable-genome) of the 4 *Planktothrix* strains using the MICFAM tool computing the SiLiX software available on MicroScope platform.

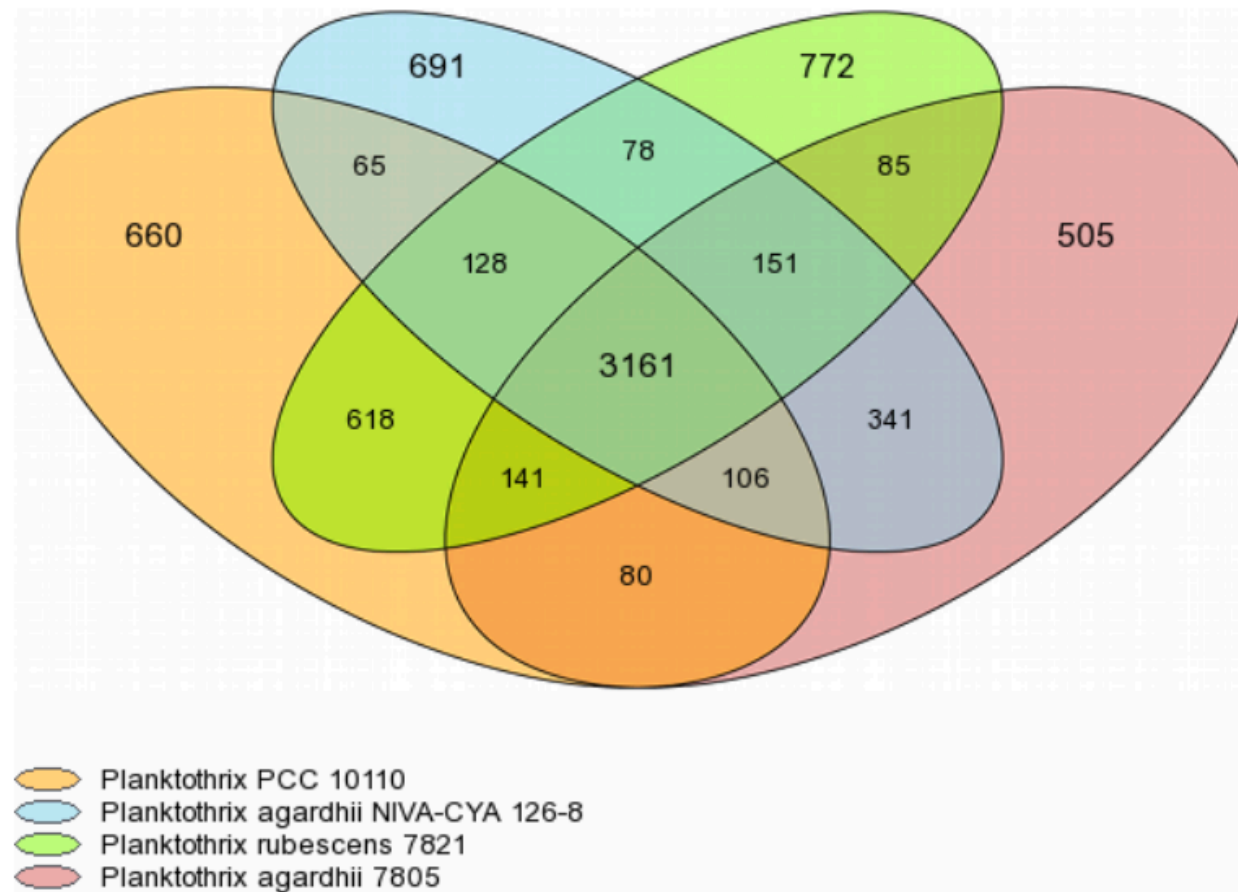

**Supplementary figure S3.** A) Principal component analysis (PCA) of the MS/MS data set generated for each one of the four analyzed in triplicate, together with the experimental MS/MS spectra list obtained for 30 purified cyanobacterial metabolites similarly analyzed (MSMS\_cyano). B) Rarefaction curve of the MS/MS cluster affection illustrates the presentativeness of the GNPS network for the global description of the 4 strains *Planktothrix* metabolomic dataset.

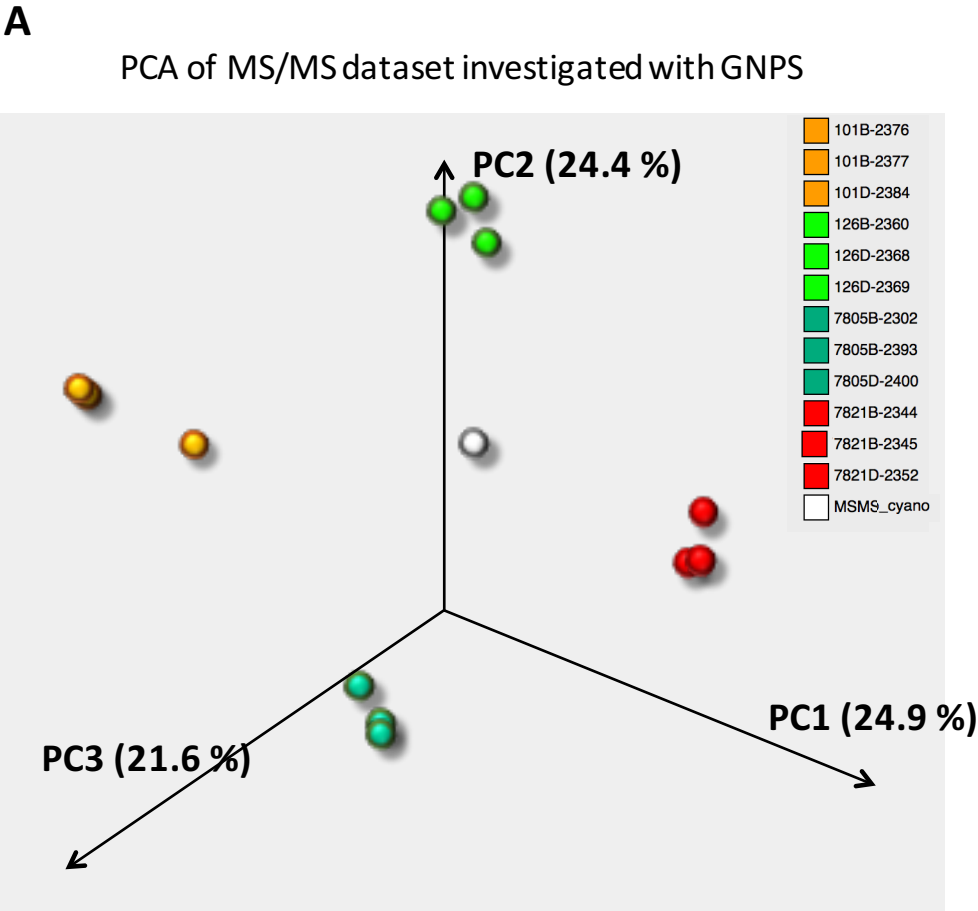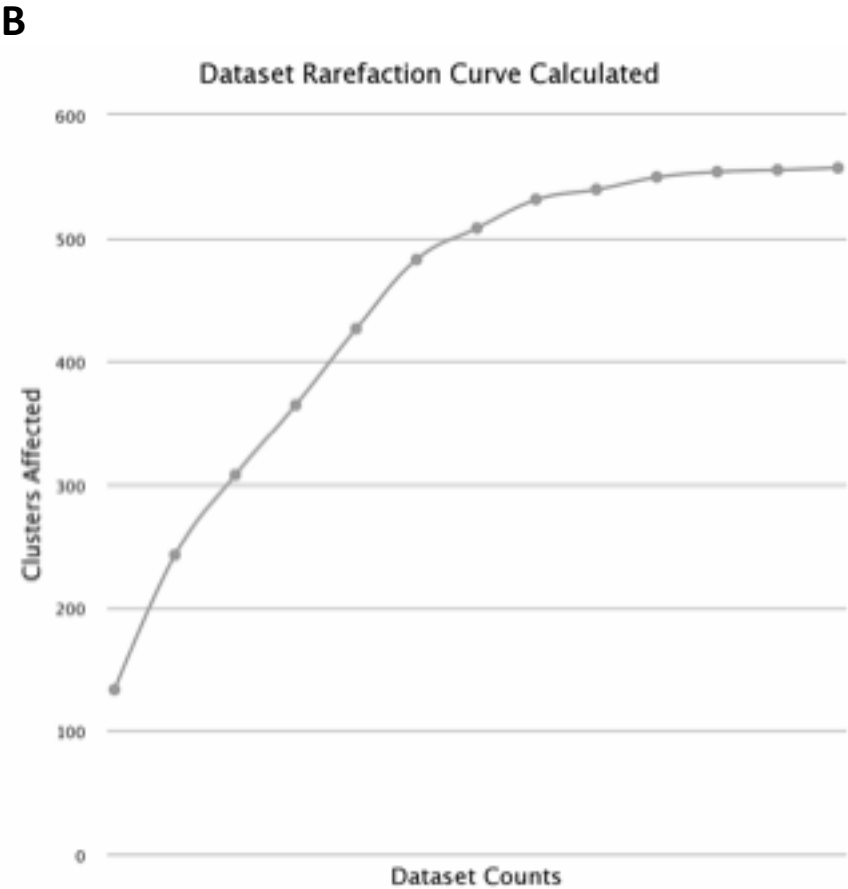

Supplement: Supplementary file 2 [file supplementary]
