# Supplementary material for: Insights into the Diversity of Secondary Metabolites of Planktothrix Using a Biphasic Approach Combining Global Genomics and Metabolomics
Source: Preprints.org preprint supplement (doi:10.20944/preprints201906.0310.v1), 2019-06-30
Supplement: Supplementary file 1 [file Supp. Table 1-4.xlsx]

## Sheet: S1 (NIVA CYA 126_8)
RT [min]	MW	Area	Annotation	Class	Criteria	Main MS/MS fragments
6.2	714.396	26753484	Aeruginoside 126A	Aeruginosin	Silver	234.1495;262.1921;280.2025;287.1873;305.1977;322.2243;412.2450;454.2668;541.3395;565.3478;583.3608;673.3820;715.4021;715.6541;715.6687
6.3	690.396	5818943	Aeruginoside 126B	Aeruginosin	Silver	192.1129;210.1223;234.1480;238.1901;256.2013;263.1859;272.1483;281.1965;298.2234;323.2084;413.2401;430.2665;541.3488;559.3605;691.4020
6.5	748.356	3.81953e+06	New aeruginosin 748	Aeruginosin	Bronze	262.1903;280.2020;287.1867;305.1972;419.2650;454.2660;461.2870;539.3219;550.3228;551.3075;563.3235;581.3445;593.3294;671.3649;713.3873;749.3614
5.6	730.391	3.06668e+06	New aeruginosin 730	Aeruginosin	Bronze	250.1442;262.1919;280.2025;287.1870;305.1977;322.2240;412.2446;454.2666;557.3339;567.3505;581.3454;599.3559;689.3764;731.3980;731.6641
7.5	758.457	550350	New aeruginosin 758	Aeruginosin	Bronze	238.1905;256.2014;263.1858;281.1966;331.2486;349.2588;388.2429;430.2652;481.3010;498.3276;559.3592;627.4213;691.4018;717.4420;759.4633
6.4	724.358	480006	New aeruginosin 724	Aeruginosin	Bronze	192.1126;210.1233;232.1337;256.2018;263.1866;281.1971;413.2390;420.2598;430.2657;437.2874;522.3065;540.3172;557.3444;569.3285;689.3861;725.3605
13.5	729.472	430311	New aeruginosin 729	Aeruginosin	Bronze	159.1167;173.1327;175.1473;183.1164;185.1321;197.1318;199.1475;201.1631;209.1317;211.1471;433.3104;525.3726;580.3761;672.4386;730.4796
7.2	592.339	378112	New aeruginosin 592	Aeruginosin	Bronze	114.1021;120.0803;140.1063;192.1125;210.1234;239.1738;256.2020;263.1865;268.1331;281.1971;298.2236;428.2643;445.2926;593.3439
7.5	908.512	10130754	Anabaenopeptin G	Anabaenopeptin	Silver	164.1070;175.1190;201.0982;257.1791;345.7188;359.7166;366.7242;369.1817;398.7217;441.2684;455.2633;513.3510;516.3223;541.3463;718.4259
10.1	915.477	8773810	New anabaenopeptin 915	Anabaenopeptin	Bronze	150.0892;164.1059;182.0797;197.1632;249.1584;277.1537;339.2403;368.2073;403.2335;449.2386;458.7429;518.3324;544.3120;548.3060;725.3848;735.4070;739.4018;916.4796
7	836.455	639740	Anabaenopeptin B	Anabaenopeptin	Gold	175.1190;201.0984;263.1397;274.1725;330.6956;345.7017;362.7100;376.7087;405.2372;419.2345;476.2618;547.3366;575.3305;660.3838;752.4102
7.3	894.498	582809	New anabaenopeptin 894	Anabaenopeptin	Bronze	107.0473;150.0899;164.1060;175.1172;201.0968;250.1695;338.7096;352.7074;369.1791;384.7219;428.2616;434.2563;448.2542;499.3340;527.3303;570.3717;704.4076;718.4249;782.4229
10	901.461	246910	Nodulapeptin 901	Anabaenopeptin	Silver	150.0890;164.1066;165.0541;182.0793;197.1651;220.0967;249.1588;263.1749;277.1539;286.1747;291.1704;369.1803;403.2345;435.2238;463.2543;468.2487;502.3033;598.3231;626.3188;693.3996;721.3928;902.4644
7.8	922.528	182049	Anabaenopeptin H	Anabaenopeptin	Silver	164.1067;175.1184;201.0978;264.1863;352.7246;366.7230;369.1813;405.7281;442.2767;462.2702;555.3609;732.4393
8.9	1769.7	2.91465e+06	Microviridin K	Cyanobactin	Silver	136.0749;178.0866;206.0816;255.1094;460.1833;591.2243;717.8035;783.3242;795.3240;804.3301;820.3410;847.8624;871.8641;876.8509;885.8593;1180.4903
8.9	1801.73	286291	Microviridin D	Cyanobactin	Silver	159.0910;167.1173;178.0864;182.0806;206.0815;255.1093;263.1036;377.1463;460.1830;591.2232;799.3355;811.3351;820.3408;836.3522;892.8653;901.8715;1212.5107
6.4	1102.54	1.7762e+06	New cyanopeptolin 1102	Cyanopeptolin	Bronze	159.0915;169.0970;175.1190;256.1449;284.1399;312.1667;329.1942;355.1772;468.2296;492.2566;516.7564;552.2749;563.2939;749.3739;935.4519
7.5	961.424	1.44232e+06	Micropeptin 90	Cyanopeptolin	Silver	157.1073;172.1182;175.1177;200.1132;201.0970;346.1696;359.1592;368.1642;406.1992;459.7230;472.7133;481.7181;561.2121;747.3267;789.1746
11.5	1072.88	771151	Aeruginopeptin 917S-A	Cyanopeptolin	Silver	185.0908;271.1387;302.1703;401.2399;442.7256;542.2906;712.3962;1073.4546;1073.5999;1073.7410;1073.8847;1074.0280;1074.1699;1074.3148;1074.4537
7.3	1023.55	17750502	[Asp3]Mcyst-RR	Microcystin	Gold	135.0791;213.0874;289.1603;291.1519;329.1931;426.2098;445.7463;447.7673;477.2613;498.7842;512.7811;620.3406;873.4550;964.5265;982.5363;989.3392;1006.5452;1024.5568;1024.8551
8.9	980.533	4647154	[Asp3]Mcyst-LR	Microcystin	Gold	135.0803;174.1345;213.0868;226.1590;265.1578;272.1352;289.1617;424.2364;461.2619;473.2821;475.2595;556.3193;685.3613;819.4697;847.4656
7	1330.63	1.352e+06	New microcystin 1330	Microcystin	Bronze	135.0812;213.0877;289.1630;331.5156;342.1716;390.8630;399.1898;399.5246;419.5422;433.8767;444.5526;529.7748;530.2772;585.7909;599.2877;599.7912;601.8035;657.3186;657.8197;666.3242
7.3	1041.57	1.25279e+06	[Ser7]Mcyst-RR	Microcystin	Silver	135.0790;161.0913;265.1579;289.1610;293.6549;316.1613;364.6694;413.1787;453.5802;485.5843;514.2799;518.7806;518.7845;521.7870;630.3952;699.4190
7.1	1009.53	1.07094e+06	[Asp3,Dha7]Mcyst-RR	Microcystin	Silver	135.0805;213.0872;289.1627;329.1932;426.2104;470.2569;489.7736;491.7764;505.7736;505.7867;506.2887;506.7884;717.3572;859.4445;876.4944
8.8	1044.53	844726	Microcystin-YR	Microcystin	Gold	135.0787;150.0912;163.1111;174.1336;213.0855;265.1578;272.1347;289.1615;442.7360;455.2281;456.2336;493.2589;507.2564;537.2767;620.3130;883.4659;911.4599;1017.5381;1018.5396;1028.5190;1045.5330
8.9	1033.45	701769	New microcystin 1033	Microcystin	Bronze	135.0799;339.1107;406.1989;419.1881;425.1934;428.1937;450.6925;460.7114;467.7030;479.7203;481.7377;495.7345;507.2003;517.7299;900.3776
7.4	1051.58	559904	[Asp3,ADMAdda5]Mcyst-RR	Microcystin	Silver	135.0781;213.0850;305.6737;314.1871;490.8059;491.2766;512.7978;513.3008;525.7849;526.7957;620.3382;717.3577;848.4589
8.2	1101.55	355444	New microcystin 1101	Microcystin	Bronze	135.0778;161.0951;174.1343;205.0627;213.0860;265.1579;272.1346;289.1602;456.2549;473.2828;483.7409;484.7466;535.7696;551.7824;968.4860
7.3	1037.57	297368	Microcystin-RR	Microcystin	Bronze	135.0798;200.1132;213.0864;271.1513;289.1621;298.1750;452.7549;484.2711;505.7915;506.2939;519.7892;887.4731
9.1	1008.57	261301	[Mdhb7]Mcyst-LR	Microcystin	Silver	135.0782;163.1107;202.1646;213.0856;230.1126;265.1580;317.1922;438.2525;489.2751;501.3129;584.3490;607.3914;875.4977
14.6	578.285	1.1068e+06	Unknown 578	Unknown	_	149.0225;245.0782;294.1002;301.1399;301.1557;301.3011;301.3114;301.5474;301.5635;342.1672;437.2054;560.3614;578.3710
6.2	767.309	879739	Unknown 767	Unknown	_	179.5696;187.5679;196.5741;224.5835;244.9454;245.1156;258.4751;264.1066;272.6097;273.1117;319.1431;322.2233;327.6444;348.6500;354.6498
1.9	765.255	759095	Unknown 765	Unknown	_	177.0755;177.8320;192.0875;194.0668;202.0720;220.0826;238.0930;238.1085;238.2463;238.2938;238.4561;238.4704;414.1615;590.1933;766.2625
1.6	767.272	676774	Unknown 767	Unknown	_	165.0108;168.0878;178.0722;179.6821;196.0830;220.0830;222.0993;238.0936;240.1092;240.1241;240.2635;240.4737;240.4877;416.1780;768.2791
7.3	1727.7	661147	Unknown 1727	Unknown	_	136.0750;167.1181;182.0810;418.1730;656.2770;670.2732;678.7873;692.7819;715.2972;723.8104;737.8093;746.3215;751.8068;760.3194;774.3165;864.8540
10.1	971.397	654014	Unknown 971	Unknown	_	250.1041;289.6222;343.1466;349.6512;352.6594;367.1709;374.1635;381.1706;395.1643;403.5869;405.1716;410.1840;432.1796;463.2049;485.7040;486.7025
6.2	582.356	532905	Unknown 582	Unknown	_	86.0959;140.1080;152.6108;161.6155;234.1489;262.1434;280.2018;287.1868;304.2134;305.1963;322.2241
10.1	968.39	502891	Unknown 968	Unknown	_	289.6226;343.1467;349.6518;352.3381;367.1715;374.1640;381.1712;395.1650;403.6279;410.1855;420.1758;432.1782;463.2054;;473.1861;526.1994;597.2729;640.2798;655.2908;683.2850;691.2661;718.2901;747.3288;789.3280;969.3932
1.4	655.118	433184	Unknown 655	Unknown	_	177.0756;187.9773;199.9774;215.9714;275.9933;289.7431;318.0039;332.0202;360.0142;362.0298;392.0404;406.0207;435.1481;582.0884;625.1957;657.2214
12	485.259	411720	Unknown 485	Unknown	_	161.9972;178.9998;186.0329;198.0327;215.0378;227.0368;230.0241;240.0814;245.0466;248.0341;266.0448;270.0906;288.1027;315.0901;328.1329;358.1443;376.1534
6.7	1361.75	366865	Unknown 1361	Unknown	_	110.0704;436.7410;493.2838;502.2877;534.8004;535.3041;543.8063;544.3078;591.3437;600.3485;616.3320;625.3372;667.8839;668.3866;681.8801
7.5	708.422	346131	Unknown 708	Unknown	_	84.0803;150.0897;164.1073;192.1022;197.1654;220.0971;261.1606;275.1820;305.1866;313.2607;341.1866;369.1821;387.2397;405.2504;468.2497;518.3338;709.4295
6.8	1059.57	336926	Unknown 1059	Unknown	_	284.6505;316.1610;413.1788;450.7499;506.2659;506.7670;521.7873;530.7941;531.2935;569.2808;630.3982
6.1	1087.55	328200	Unknown 1087	Unknown	_	342.1855;384.7299;390.2223;398.7261;530.7828;544.7787;683.3631
5.4	706.392	317346	Unknown 706	Unknown	_	192.1134;210.1241;238.1918;250.1441;256.2025;263.1871;272.1502;281.1976;282.1821;298.2242;323.2080;413.2401;430.2667;575.3557;707.3984
14.6	890.374	297362	Unknown 890	Unknown	_	185.9844;203.9968;232.0277;235.0262;260.0603;279.0870;288.0919;301.0005;307.1178;316.1230;326.9789;344.9905;401.0537;457.1136;513.1792
13.5	490.315	281956	Unknown 490	Unknown	_	121.1011;123.1169;135.1168;137.1324;149.1328;153.1273;163.1472;177.1632;181.1578;219.2100;237.2206;255.2309;311.2574;329.2676;473.3117
12.2	1547.68	217057	Unknown 1547	Unknown	_	85.0643;151.1116;169.1230;583.2105;584.7168;605.2250;638.2484;639.7507;647.2529;648.7566;690.7844;732.8123;774.8413;1209.4330;1381.5566
12.9	1628.72	194966	Unknown 1628	Unknown	_	85.0650;151.1102;169.1215;605.2230;618.2391;638.2472;639.7496;647.2515;690.7849;732.8108;774.8431;775.3432;815.8648;816.8682;1377.5530
6	743.307	189863	Unknown 743	Unknown	_	167.5691;175.5671;224.6028;233.1164;252.1061;260.1082;261.1112;298.1372;306.1450;307.1424;315.6448
13.5	1659.87	186407	Unknown 1659	Unknown	_	123.1158;151.1103;169.1213;376.1494;578.7674;611.7923;612.2925;620.7969;621.2961;654.3231;1156.5276;1240.5812;1241.5904;1324.6410;1325.6435

## Sheet: S2 (PCC 7805)
RT [min]	MW	Area	Annotation	Class	Criteria	Main MS/MS fragments
10.2	586.278	3.00839e+06	Aeruginosin NAL2	Aeruginosin	Silver	253.1404;271.1443;281.1305;284.9060;299.1398;331.9539;346.1957;392.1958;403.8876;420.0761;464.2181;527.2640;569.2743;571.0491;585.2707;587.2847
8	868.283	2713028	New aeruginosin 868 dichl	Aeruginosin	Bronze	114.1022;140.1081;263.1863;281.1969;430.2662;437.2875;569.3292;604.2873;621.3138;657.2892;681.2985;753.3555;789.3299;789.5938;794.3348
11.2	948.242	946866	New aerugnosin 948	Aeruginosin	Bronze	155.0250;263.1867;281.1975;298.2236;430.2658;437.2872;569.3292;621.3145;657.2892;662.2903;753.3569;789.3309;789.5948;789.6106;794.3337;869.2870
8	788.327	671243	New aeruginosin 788	Aeruginosin	Bronze	114.1032;192.1129;256.2014;263.1861;272.1495;281.1972;303.1329;413.2391;420.2604;430.2659;437.2861;569.3291;604.2885;621.3142;681.3009;753.3560;789.3305
6.6	820.308	659641	Aeruginosin 820	Aeruginosin	Silver	114.1025;263.1860;281.1968;413.2395;430.2658;437.2867;538.3021;556.3124;569.3289;573.3390;609.3136;633.3234;688.3555;705.3808;741.3551
6.2	786.347	644310	New aeruginosin 786	Aeruginosin	Bronze	114.1033;250.1428;256.2015;263.1864;281.1968;323.2067;413.2392;430.2659;533.3332;543.3494;557.3382;575.3551;707.3966;707.6448;708.0559
6.3	740.351	584125	New aeruginosin 740	Aeruginosin	Bronze	114.1028;122.0968;192.1129;210.1232;238.1909;256.2013;263.1859;272.1485;281.1966;284.1044;323.2073;413.2390;430.2655;543.3499;591.3025;609.3136;741.3553
11.2	868.284	572448	Oscillamide B	Aeruginosin	Silver	155.0251;263.1865;281.1967;298.2229;430.2646;437.2872;569.3289;604.2893;621.3135;657.2890;753.3549;789.3304;794.3332
7.7	834.323	483577	New aeruginosin 834 chl	Aeruginosin	Bronze	114.1029;210.1230;256.2015;263.1860;272.1484;281.1967;298.1201;298.2227;413.2397;430.2658;581.3098;623.3292;755.3708;755.5249;755.6292;756.0532;760.3790
5.7	706.39	476607	New aeruginosin 706	Aeruginosin	Bronze	114.1028;192.1123;210.1234;238.1905;250.1430;256.2015;263.1860;272.1486;280.2126;281.1967;298.2233;323.2076;413.2390;430.2657;557.3442;575.3549;707.3966
8	872.283	434451	New aeruginosin 872	Aeruginosin	Bronze	263.1871;281.1976;298.2238;413.2400;420.2611;430.2665;437.2875;569.3296;604.2873;621.3136;657.2874;681.2989;753.3555;789.3284;789.6014
7.2	850.318	309443	Aeruginosin 850	Aeruginosin	Silver	114.1026;263.1856;281.1964;413.2389;430.2647;567.2678;569.3287;607.2996;639.3236;643.2753;699.3087;739.3412;771.3649;771.6252;775.3167
6.4	774.313	163589	New aeruginosin 774	Aeruginosin	Bronze	210.1242;238.1910;263.1865;281.1970;413.2398;420.2603;430.2660;437.2873;569.3292;590.2719;607.2976;739.3403;771.3694;775.3154;780.3192
7.2	854.269	157020	New aeruginosin 854	Aeruginosin	Bronze	114.1027;263.1854;281.1968;430.2658;437.2874;569.3284;590.2719;607.2975;639.3237;643.2722;699.3092;739.3398;771.3658;775.3144;780.3171
6.9	754.366	134105	New aeruginosin 745	Aeruginosin	Bronze	114.1027;210.1234;238.1911;256.2015;263.1861;272.1488;281.1968;298.1199;298.2235;323.2076;413.2393;430.2662;543.3500;623.3302;755.3716
8.4	882.3	126458	New aeruginosin 882	Aeruginosin	Bronze	114.1026;263.1859;281.1965;413.2386;430.2658;451.3021;583.3446;618.3046;635.3287;671.3035;681.2991;767.3707;803.3452;808.3490
5.7	802.342	78674	New aeruginosin 802	Aeruginosin	Bronze	263.1861;281.1966;430.2656;591.3494;651.3347;723.3911
8.2	912.233	49527	New aeruginosin 912	Aeruginosin	Bronze	86.0962;263.1864;281.1967;413.2393;430.2658;437.2862;569.3288;648.2385;650.2360;665.2612;701.2356;797.3029;833.2774
12.2	928.504	4644344	Prenylagaramide B	Prenylagaramides	Silver	136.0757;183.1490;204.1381;211.1441;261.1234;301.1911;325.1871;329.1860;374.2076;381.1812;442.2700;443.2292;471.2240;488.2508;556.3121;605.3338;929.5102
12.1	1020.6	3.13658e+06	Prenylagaramide C	Prenylagaramides	Silver	183.1491;204.1380;211.1442;226.1189;297.1559;420.7349;432.2248;436.2557;454.7672;460.2197;477.2766;507.2928;670.3569;840.4625;953.5460;1021.6063
12.1	952.541	2.17681e+06	New prenylagaramide 952	Prenylagaramides	Bronze	86.0960;136.0755;183.1496;211.1442;226.1186;297.1563;299.1401;392.2238;420.7346;452.2191;460.2206;462.2025;480.2135;507.2931;670.3551;783.4412;840.4619
12.1	1042.58	560628	New prenylgaramide 1042	Prenylagaramides	Bronze	169.1334;197.1282;226.1184;297.1560;310.2116;351.2021;411.2232;507.2926;528.2815;812.4141;825.4232;868.4769;1021.6057;1043.5867;1043.8930
12.1	860.446	150346	New Prenylagaramide 860	Prenylagaramides	Bronze	136.0745;183.1487;211.1435;212.1017;233.1276;261.1219;277.1538;301.1904;313.1173;325.1867;374.2063;375.1665;471.2227;488.2480;509.2730;861.4467
12.1	1076.52	1.72772e+06	New cyanopeptolin 1076	Cyanopeptolin	Bronze	450.2067;474.7164;475.6998;488.7319;503.7320;504.2321;505.2338;508.7477;516.1385;537.7657;539.2648;900.4147;981.4662;992.4347;1009.4603
12	1073.52	1.72122e+06	New cyanopeptolin 1073	Cyanopeptolin	Bronze	107.0490;411.2135;450.2081;474.7171;475.7010;481.1473;488.7342;494.7242;503.7324;508.7368;523.7704;528.7550;537.7654;900.4137;981.4660;1006.4576;1007.4619;1009.4618
9.9	1088.51	1.54665e+06	Oscillapeptin F	Cyanopeptolin	Silver	129.1025;134.0969;181.1335;195.1127;209.1284;293.1858;356.1963;370.2125;370.2312;491.2482;498.3077;581.3458;622.3452;655.3344;712.4385;783.4290;860.4555;991.5488;1009.5598
9.9	1102.52	1500251	New cyanopeptolin 1102	Cyanopeptolin	Bronze	134.0969;143.1186;181.1333;209.1284;226.1546;293.1860;370.2122;505.2654;636.3597;655.3332;713.3858;726.4537;797.4430;874.4699;991.5490;1005.5631;1019.5801;1023.5749;1085.5220
11.5	1072.88	1.09807e+06	Aeruginopeptin 917S-A	Cyanopeptolin	Silver	171.1129;185.0921;205.1182;271.1407;302.1715;401.2401;442.7258;471.2562;712.3992;1073.4579;1073.5998;1073.7441;1073.8879;1074.0331;1074.1727;1074.3167;1074.4598;1074.6026
9.9	1141.43	1.06929e+06	New cyanopeptolin 114	Cyanopeptolin	Bronze	134.0967;258.1489;293.1861;363.1179;443.6912;457.6107;466.6137;500.2180;522.7362;524.2373;530.7380;531.7408;533.2429;562.7147;571.2435;571.7210
9.9	1070.5	834426	New cyanopeptolin 1070	Cyanopeptolin	Bronze	86.0965;134.0959;146.0811;181.1333;200.1643;209.1283;245.1650;252.1229;280.1175;293.1861;416.7328;439.7359;482.2802;496.2775;694.4279;712.43;83783.4269;860.4523;878.4636;991.5465;1005.5645
9.9	1116.54	479472	Nostocyclin	Cyanopeptolin	Silver	134.0969;181.1336;209.1282;223.1432;370.2125;519.2809;727.4033;888.4856;991.5488;1005.5639;1019.5790;1020.3305;1031.5403;1037.5900;1045.5571;1063.4765;1085.5204;1115.9969
9.9	1155.44	414789	New cyanopeptolin 1155	Cyanopeptolin	Bronze	134.0972;258.1490;293.1865;424.7033;433.7078;464.6955;474.7032;500.2174;500.7189;509.2229;522.7349;530.2381;538.7471;561.1851;571.2213;579.2309;579.6196;580.2258;674.2301
9.9	1169.45	395680	New cyanoppetolin 1169	Cyanopeptolin	Bronze	134.0959;258.1478;293.1859;330.6167;343.1153;462.6835;471.6226;480.1980;481.7105;507.2237;507.7251;516.2302;523.2375;529.7412;530.2407;537.2452;538.7459;545.7539;578.2247;578.7240;585.7329;587.2347
9.9	1145.43	377314	Aeruginopeptin 95-A	Cyanopeptolin	Silver	226.1547;258.1492;293.1863;364.1502;444.6927;457.6919;458.6900;467.6960;522.7361;524.2374;531.7405;533.2428;563.7139;564.2154;572.2230;572.6534;573.2211
9.9	1084.52	337161	New cyanopeptolin 1084	Cyanopeptolin	Bronze	120.0661;134.0954;181.1325;200.1632;209.1286;252.1223;280.1182;293.1860;408.7466;482.2805;489.2887;496.2777;503.2862;617.3293;712.4378;816.4866
14.5	1127.51	327431	Oscillapeptin D	Cyanopeptolin	Silver	209.1279;293.1849;358.2117;363.1547;370.2117;502.2680;512.2382;519.2960;650.3902;655.3329;715.4162;720.3594;733.4269;1012.5355;1030.5452
9.9	1098.53	267198	New cyanopeptolin 1098	Cyanopeptolin	Bronze	134.0963;181.1329;200.1637;209.1277;252.1228;408.7467;489.2882;496.2959;503.2861;510.2934;510.7959
9.9	1159.45	251114	New cyanopeptolin 1159	Cyanopeptolin	Bronze	258.1493;293.1858;465.6981;474.7028;500.2167;531.2397;539.8768;571.2232;578.2497;578.7247;578.7524;579.2292;580.2277
9.7	1074.49	242047	New cyanopeptolin 1074	Cyanopeptolin	Bronze	134.0958;167.1173;181.1333;195.1118;197.1269;209.1286;293.1842;356.1959;370.2129;484.2906;491.2500;622.3437;769.4140;846.4390;977.5333;995.5434
14.7	1040.58	231796	New cyanopeptolin 1040	Cyanopeptolin	Bronze	239.2373;311.0276;313.2738;331.2848;387.2031;389.1971;440.2701;506.3326;521.2948;524.3425;546.2480;549.2557
4.5	983.529	114762	Micropeptin HA983	Cyanopeptolin	Silver	90.0547;115.0868;272.1235;284.1236;383.1931;385.2086;412.2184;421.7342;448.2484;472.2398;492.7714;600.3356;713.4184;796.4186;842.4611
5.4	1049.52	101324	Anabaenopeptilide 202-A	Cyanopeptolin	Silver	129.1029;245.0761;272.1234;447.7184;516.7586;525.7640;537.2777;650.3606;779.4039;894.4303
7.2	1358.6	4.55868e+06	Unknown 1358	Unknown	_	86.0965;102.0546;126.0915;171.1125;199.1096;310.1403;567.2193;614.7583;620.7622;623.7644;629.7810;657.2983;662.2910;666.3086;671.2989;680.3053;1032.4561
12.1	981.427	2.73931e+06	Unknown 981	Unknown	_	107.0489;353.1099;381.1051;382.6375;386.6699;404.1646;420.7024;435.1783;457.6889;469.2102;491.2161;491.7197;493.7193;565.1938;593.1887;914.3705
4.9	1065.55	1901040	Unknown 1065	Unknown	_	86.0960;88.0388;110.0713;112.0870;113.0710;115.0867;120.0810;127.0505;207.1238;254.1609;287.1502;313.1059;318.4950;346.8582;347.1930;356.1899;465.2520;497.7878;525.2665;525.7678;533.7790
12.1	984.429	1.24604e+06	Unknown 984	Unknown	_	353.1095;381.1046;382.6377;386.6700;404.1643;420.7015;435.1783;443.6920;457.6891;469.2106;491.7194;493.7194;565.1929;593.1879;914.3709;917.3673
2.2	585.264	1.20171e+06	Unknown 585	Unknown	_	83.0485;87.0435;97.0281;99.0439;101.0594;111.0436;143.0701;161.7675;175.0963;184.0602;186.0761;198.0757;216.0868;248.1132;266.1235;280.1393;426.1972;444.0330;586.2713
1.3	528.169	792911	Unknown 528	Unknown	_	127.0379;145.0481;159.0646;163.0598;173.0438;177.0749;191.0544;241.0694;285.0605;303.0706
8.2	921.304	695694	Unknown 921	Unknown	_	177.0321;199.0715;210.0126;222.5908;232.0855;259.6006;260.1040;277.0871;329.1143;337.6173;338.1189;351.1349;355.5462;356.1070;386.1009;391.6147;394.5758;421.6238;462.1044;463.1637;483.1671;519.2001;526.1749;555.1778;710.2003;842.2410;922.2001
7	836.455	503256	Unknown 836	Unknown	_	158.0912;175.1186;201.0980;231.1488;263.1388;274.1707;330.6955;345.7008;362.7102;376.7084;405.2367;419.2341;476.2612;575.3298;660.3837;752.4095
7.2	1411.51	417612	Unknown 1411	Unknown	_	86.0963;427.4834;436.1553;436.4895;442.1574;456.8335;465.8408;466.5090;471.8428;611.2151;611.7106;615.2264;623.7296;624.2304;632.2206;640.7226;641.2260;663.2378;684.7489;706.7622
8	906.233	377056	Unknown 906	Unknown	_	196.0910;215.6137;216.6172;224.1204;233.1265;238.1202;244.1178;247.1259;321.1246;330.1340;341.0065;350.1361;378.1440;379.1180;436.1336;454.1209
6.7	1361.74	323720	Unknown 1361	Unknown	_	334.1867;436.7397;445.7445;493.2822;502.2867;502.7875;534.7996;543.8051;583.8175;591.3413;600.3474;600.8500;625.3367;667.8820;681.8783
1.2	565.072	323406	Unknown 565	Unknown	_	112.0502;208.0714;276.1019;306.0478;379.1202;404.0251;495.1319;569.1680
8.1	927.206	267653	Unknown 927	Unknown	_	176.5643;224.5961;232.1083;233.1079;260.1039;260.6032;278.7025;312.0886;330.1139;338.1212;339.1187;357.1064;405.1403;423.1255;463.1041;466.2330
6.6	873.221	213730	Unknown 873	Unknown	_	223.5956;232.0717;232.1080;232.6012;260.1036;277.8982;296.2073;298.2232;299.1276;305.1273;314.1312;332.1190;367.6277;399.1410;438.1193
7.7	887.237	197522	Unknown 887	Unknown	_	175.5669;224.1111;233.1159;252.1063;260.1036;260.1082;261.1111;338.1211;339.1260;374.6353;377.5956;404.6464;406.1483;446.1278
12.2	1912.93	196162	Unknown 1912	Unknown	_	325.1865;381.1059;492.1671;493.2168;605.3319;766.4472;901.5173;912.4841;929.5100;952.4943;955.9668;956.4632;957.4666;983.3270;985.4262;989.4252
9.7	1127.41	121892	Unknown 1127	Unknown	_	345.1401;410.6871;419.6915;489.6810;509.7236;515.7246;517.2279;524.7294;557.2071;564.7070

## Sheet: S3 (PCC 7821)
RT [min]	MW	Area	Annotation	Class	Criteria	Main MS/MS fragments
7.5	616.339	11378691	Aeruginosin NOL4	Aeruginosin	Silver	96.0792;113.1058;120.0803;120.0819;136.8380;140.1068;155.1286;268.1323;280.2011;287.1858;305.1965;322.2231;469.2921;575.3228;617.3448
7.4	592.337	9089864	Aeruginosin 592	Aeruginosin	Silver	114.1022;120.0806;122.0962;131.1293;140.1075;256.2014;263.1861;268.1329;281.1966;298.2235;428.2665;445.2928;593.3451;593.5749
6.7	632.331	2666332	Aeruginosin 632	Aeruginosin	Silver	86.0956;113.1072;120.0806;132.1023;140.1076;280.2014;284.1278;287.1861;305.1969;322.2235;418.2091;469.2926;591.3182;631.3122;633.3395
7.7	600.294	617803	New aeruginosin 600	Aeruginosin	Bronze	86.0954;118.0864;162.1030;202.0985;204.0953;227.1012;243.1249;271.1178;289.1308;295.1645;376.1972;388.1975;406.2078;597.3763;601.2973
6.6	608.333	430790	Aeruginosin KT608B	Aeruginosin	Silver	114.1027;120.0809;122.0964;140.1076;210.1226;256.2008;263.1852;281.1963;284.1271;298.2228;445.2918;520.7795;521.2815;591.8201;609.3388
9.9	857.432	9291048	Oscillamide Y	Anabaenopeptin	Gold	84.0804;86.0596;114.0560;231.1490;233.1286;376.2245;405.2138;417.2506;540.2826;564.3198;568.2776;649.3766;677.3675;681.3619;858.4400
7.4	850.47	8808300	Anabaenopeptin E/F	Anabaenopeptin	Gold	107.0483;107.0484;112.0862;114.0545;120.0803;129.8102;150.0920;175.1181;201.0972;263.1391;281.1788;337.7034;369.7190;383.7162;387.2399;412.2455;426.2432;476.2622;588.3449;674.3999;766.4260
7.2	836.455	5566465	Anabaenopeptin B	Anabaenopeptin	Gold	107.0488;112.0866;114.0547;120.0806;129.8479;150.0923;175.1211;330.6960;362.7108;405.2383;419.2357;476.2625;575.3317;660.3847;752.4108
9.6	843.414	4.94812e+06	Anabaenopeptin A	Anabaenopeptin	Gold	84.0799;114.0548;263.1383;362.2071;403.2337;405.2132;458.2786;486.2742;540.2816;550.3025;568.2765;635.3592;663.3498;667.3446;844.4232
7.5	650.379	567760	New anabaenopeptin 650	Anabaenopeptin	Bronze	84.0800;86.0593;114.0548;120.0808;129.1028;231.1481;233.1291;263.1381;361.2593;376.2227;401.2544;446.3122;548.3226;566.3334;651.3859
6.2	841.383	412717	Nostamide A	Anabaenopeptin	Silver	86.0959;241.1173;249.0683;274.0998;275.0842;320.1056;334.1578;379.1790;390.2135;399.7012;402.2134;421.6962;423.1689;492.2636;637.3016
8.2	628.323	2.85668e+06	New prenylagaramide 628	Prenylagaramides	Bronze	100.1119;146.1185;162.1038;227.1384;255.1336;271.1181;323.1970;398.2187;404.2297;416.2292;434.2401;629.3301
8.5	1093.53	7.19623e+06	New cyanopeptolin 1093	Cyanopeptolin	Bronze	86.0959;101.0707;106.0477;124.0759;132.6863;212.1020;216.1012;238.1067;266.1019;280.1664;325.1865;477.1982;524.7679;533.7772;547.7744;652.3424;801.4505
6.5	846.448	1.19229e+06	New cyanopeptolin 846	Cyanopeptolin	Bronze	150.0921;309.1775;325.1868;346.1761;356.1605;374.1712;442.2336;487.0710;503.2497;570.2927;680.3331;698.3496;783.4392;811.4312;829.4452
8.8	1125.56	1035611	Planktopeptin BL 1125	Cyanopeptolin	Silver	212.1022;356.1605;374.1712;394.1610;477.1984;495.2092;501.2715;576.3034;584.3083;604.2981;697.3921;715.4029;843.4612;977.4605;995.4724;1108.5562
8.8	1107.55	942300	New cyanopeptolin 1107	Cyanopeptolin	Bronze	86.0962;100.1126;101.0712;106.0478;132.8233;238.1063;266.1017;294.1805;477.1977;540.7841;547.7740;551.7395;554.7817;666.3610;815.4661
8.1	1111.54	856067	Oscillapeptin G	Cyanopeptolin	Silver	101.0708;212.1021;309.1806;330.1447;356.1605;374.1713;394.1609;477.1984;487.2549;590.2824;785.3719;870.4605;898.4564;1094.5405;1112.5516
7.5	1023.55	11531019	(Asp3)Mcyst-RR	Microcystins	Gold	91.0541;102.9796;105.0681;112.0854;115.0852;117.0050;135.0806;157.1078;161.1000;174.1353;175.1176;498.7825;512.7830;620.3400;872.4572;890.4847
5.6	1282.65	4.78766e+06	New microcystin 1282	Microcystins	Bronze	103.0540;105.0696;112.0868;115.0865;117.0104;126.8190;135.0810;244.0562;413.2256;413.8949;428.5583;444.7388;453.7442;520.7818;906.4811
9.1	980.534	1896262	(D-Asp3)Mcyst-LR	Microcystins	Gold	86.0957;103.0540;105.0697;107.0853;112.0868;117.0699;135.0810;265.1584;289.1616;423.2321;473.2840;475.2618;765.3935;836.4310;847.4677
6.4	1057.56	1.67606e+06	New microcystin 1057	Microcystins	Bronze	84.0437;105.0695;135.0809;397.6991;412.7049;444.7356;453.7432;465.2641;493.7927;494.2631;520.7800;529.7856;871.2639;888.4639;906.4791
6.3	1039.54	1.66338e+06	[MAdda5,MSer7]Mcyst-LR	Microcystins	Silver	112.0868;263.1421;280.1688;426.2098;475.7820;476.2562;489.2651;495.7616;497.7755;502.7660;511.7748;520.7804;582.3106;693.3305;711.3538
5.6	1296.67	1.0654e+06	New microcystin 1296	Microcystins	Bronze	88.1116;105.0698;126.7477;135.0810;213.1307;258.1266;278.6685;397.6988;417.8966;418.5648;433.2279;444.7382;453.7434;520.7801;906.4796
7.8	614.312	10633178	Oscillaginin A	Microginin	Silver	86.0959;132.1014;138.0909;155.1178;162.1010;174.1030;189.1256;202.1014;241.1174;271.1178;309.1808;390.2140;402.2133;420.2245;615.3143
7.9	580.348	9730125	Oscillaginin B	Microginin	Silver	86.0956;128.1435;132.1015;138.0909;140.1435;155.1178;158.1523;168.1390;241.1177;309.1808;356.2547;368.2549;386.2656;581.3552
8.2	648.269	5091203	New microginin 648	Microginin	Bronze	86.0955;132.1019;138.0916;155.1188;160.0878;196.0655;236.0561;241.1178;305.0781;309.1815;406.9673;424.1743;436.1736;454.1846;649.2749
7.9	598.313	3224261	New microginin 598	Microginin	Bronze	86.0957;109.1000;112.0393;114.0913;126.1279;138.0920;162.1036;225.1227;243.1333;309.1806;374.2184;386.2179;404.2290;420.2135;599.3185
6.4	594.327	2647476	New microginin 594	Microginin	Bronze	86.0959;87.0434;96.0806;97.0647;100.3469;128.1437;132.1025;142.1235;241.1175;251.1387;269.1490;309.1805;364.2230;370.2336;382.2338;400.2451;595.3342
8	564.352	1.9954e+06	New microginin 564	Microginin	Bronze	86.0957;112.0395;114.0914;128.1437;138.0921;197.1274;225.1226;239.1746;243.1333;309.1808;340.2596;352.2596;370.2703;420.2134;565.3603
7.3	403.268	1.83968e+06	New microginin 403	Microginin	Bronze	86.0958;100.0389;118.0499;128.0347;128.1437;132.1024;138.0916;213.1217;241.1168;259.1278;273.1801;291.1906;356.2540;368.2536;404.2750
7.2	437.229	1.55156e+06	New microginin 437	Microginin	Bronze	86.0958;109.1004;118.0501;126.1281;128.0345;132.1024;138.0921;162.1041;241.1177;259.1281;307.1397;325.1501;390.2130;402.2139;438.2347
5.3	821.437	1.30994e+06	New microginin 821	Microginin	_	86.0958;127.0321;132.1023;252.1514;282.1686;299.1738;305.1739;314.1792;325.2408;355.2518;369.2305;424.2737;440.2735;452.2680;496.2579
8	579.341	417313	New microginin 579	Microginin	Bronze	86.0959;128.1438;132.1025;237.1588;241.1175;309.1807;321.2169;356.2542;368.2542;386.2650;434.3018;543.3179;561.3282;580.0715;580.8491
8.5	2223.09	9064800	Unknown 2223	Unknown	_	150.0910;374.1709;477.1977;477.1981;487.2553;590.2815;590.2823;683.3763;701.3857;701.3870;829.4439;829.4457;981.4543;1094.5387;1094.5418
3.9	983.332	4386752	Unknown 983	Unknown	_	85.0276;97.0281;99.0437;111.0439;113.0232;127.0392;141.0552;145.0503;155.0354;220.0820;238.0924;414.1627;780.2801;808.2746;984.3417
2.7	955.302	3.61749e+06	Unknown 955	Unknown	_	85.0277;97.0280;99.0437;111.0439;127.0391;141.0189;145.0504;220.0820;238.0924;238.1778;238.2377;238.4558;238.4755;414.1622;956.3100
8.5	1968.91	2.19763e+06	Unknown 1968	Unknown	_	104.0526;120.0808;130.0655;182.9178;198.1271;210.1271;595.6033;626.2950;647.9784;657.3097;691.8150;778.8698;792.8694;821.3793;871.9001;872.9021;886.8994;951.4284
2.4	603.202	2.17319e+06	Unknown 603	Unknown	_	85.0276;111.0441;178.0714;192.0863;194.0665;220.0820;238.0924;238.1775;238.2944;238.4552;400.1463;442.1576;604.2097
6.5	828.438	1480039	Unknown 828	Unknown	_	86.0958;101.0705;150.0904;169.0961;194.0920;197.0914;212.1018;216.1016;250.1425;280.1648;304.0301;307.1760;308.1608;312.6888;318.1734;325.1867;326.1706;383.7099;392.2186;401.2286;406.5874
2.8	779.271	1.40784e+06	Unknown 779	Unknown	_	85.0278;87.0431;97.0282;99.0436;111.0441;127.0393;145.0503;194.0657;220.0819;238.0926;238.1777;238.4552;414.1623;604.2115;780.2779
8.5	1164.46	1.27697e+06	Unknown 1164	Unknown	_	86.0958;106.7754;150.0922;387.1619;478.1966;487.1722;530.7252;539.2291;539.7307;558.7207;566.7236;567.7272;574.2302;582.2319;583.2350
7.1	1358.6	1161564	Unknown 1358	Unknown	_	86.0960;102.0547;567.2214;614.7645;620.7607;623.7650;629.7812;657.2977;662.2917;666.3078;671.2989;680.3052;1143.4864;1161.5019;1245.5194
1.6	746.249	947446	Unknown 746	Unknown	_	85.0278;87.0436;97.0281;99.0438;109.0283;111.0441;113.0235;117.0547;127.0399;141.0191;141.0554;145.0504;155.0352;285.0597;367.1233
1.6	542.186	856416	Unknown 542	Unknown	_	85.0278;87.0431;97.0278;99.0437;111.0441;127.0390;145.0496
7.9	1984.9	797918	Unknown 1984	Unknown	_	368.2534;581.3543;927.4274;927.9297;952.9459;953.4480;959.4252;961.4575;984.4528;984.9452;993.4562;993.6300;993.7413;996.9662;997.5336
0.9	486.209	732823	Unknown 486	Unknown	_	100.0208;127.0326;198.1046;200.1207;225.1227;243.1325;244.1100;251.0409;258.1263;324.1316;340.1262;368.1210;412.1101;485.2005;487.2150
6.7	630.304	679718	Unknown 630	Unknown	_	86.0959;280.2014;284.1275;287.1852;305.1963;322.2227;418.2102;436.2183;631.3105;633.3388
7.8	1228.62	671594	Unknown 1228	Unknown	_	86.0956;132.1022;241.1177;271.1186;289.1292;309.1810;384.2037;390.2139;402.2136;420.2244;436.2085;597.3046;615.3137;615.4517;615.5461
1.9	765.256	668350	Unknown 765	Unknown	_	85.0279;87.0436;97.0280;99.0437;111.0442;127.0391;220.0816;238.0924;238.4542;414.1623;590.1947;766.2614
0.9	505.203	602652	Unknown 505	Unknown	_	74.0962;100.0210;127.0328;129.0282;200.1208;230.0946;243.1330;244.1103;244.2556;244.4774;261.0993;263.1014;506.2100
9.2	1292.56	593170	Unknown 1292	Unknown	_	159.0906;168.0819;170.0593;182.0964;194.0965;198.1269;237.1151;268.1409;431.8602;527.1970;529.2298;529.7298;548.6462;604.7463;613.2525;619.2522;621.3281;638.2793;638.7800;646.2799;646.7860;647.2832;651.7878
7.9	1160.69	583680	Unknown 1160	Unknown	_	86.0958;128.1436;132.1022;241.1177;255.1702;259.1289;309.1808;350.2438;356.2545;368.2544;386.2653;436.2089;563.3442;581.3548;581.5806
6.9	552.317	553046	Unknown 552	Unknown	_	86.0959;100.1117;112.1124;132.1015;140.1072;227.1371;241.1169;259.1287;309.1804;310.2104;322.2118;328.2220;340.2221;358.2328;553.3227
7.6	1098.52	552266	Unknown 1098	Unknown	_	84.0801;114.0551;263.1383;379.1795;405.1588;422.1860;423.1701;449.1491;461.7285;528.2729;550.2676;652.3271;680.3221;765.4111;793.4059
1.8	941.288	535469	Unknown 941	Unknown	_	85.0278;97.0277;127.0389;145.0493;220.0819;238.0925;238.2357;238.4549;414.1618;942.2939
7.5	903.383	535290	Unknown 903	Unknown	_	112.0869;116.0702;157.1080;175.1180;200.1132;201.0975;366.0557;407.1721;435.6855;444.1323;453.1014;640.2302;730.2880;731.2823
1.1	612.152	520765	Unknown 612	Unknown	_	84.0434;96.0441;98.0561;102.0547;109.0522;112.0348;116.0168;125.0183;130.0495;231.0434;235.0194;243.0444;257.0761;308.0906;355.0732
8.8	1178.47	499474	Unknown 1178	Unknown	_	106.7993;150.0902;309.1808;394.1696;476.1981;485.2042;494.1811;503.1875;537.7333;546.2374;546.7391;565.7290;568.2306;574.7354;581.2385;589.2400;590.2430
8	596.321	496360	Unknown 596	Unknown	_	86.0959;225.1228;241.1182;309.1806;321.2170;386.2196;390.2129;402.2136;420.2238;434.3015;543.3181;549.3289;561.3288;579.3397;597.3211
0.8	456.161	494218	Unknown 456	Unknown	_	113.1076;184.0913;230.0948;251.0411;267.0365;283.0313;310.1143;326.1094;339.0218;354.1049;370.1004;398.0939;413.1787;455.1172;457.1679
9.9	910.351	417576	Unknown 910	Unknown	_	107.0490;120.0572;288.5971;316.2902;330.6450;338.1334;344.1439;351.6497;352.1511;356.6406;365.1483;366.0449;368.6454;374.5841;403.1586;434.1847;456.6052
1.6	781.286	416435	Unknown 781	Unknown	_	85.0277;97.0280;99.0437;111.0439;127.0392;155.0342;339.1279;367.1233;509.1484;565.1739;583.1844;593.1682;639.2108;713.2105;787.2474
8.2	1097.53	394668	Unknown 1097	Unknown	_	101.0708;212.1024;356.1602;374.1708;442.2335;477.1978;487.2548;495.2089;562.2866;570.2922;590.2819;669.3602;687.3708;815.4290;963.4438;1080.5237

## Sheet: S4 (PCC 10110)
RT [min]	MW	Area	Annotation	Class	Criteria	Main MS/MS fragments
7.2	592.337	19269194	New aeruginosin 592	Aeruginosin	Bronze	114.1035;120.0820;120.0821;122.0976;131.1306;140.1070;192.1131;210.1236;238.1916;239.1758;256.2020;263.1867;268.1332;281.1967;281.2141;298.2238;428.2659;445.2923;593.3435;593.5871
7	642.294	233874	Aeruginosin GE642	Aeruginosin	Silver	82.0659;114.1044;120.0827;122.0983;140.1097;210.1249;238.1925;239.1760;256.2028;263.1874;281.1979;298.2245;318.0874;445.2923;643.2983
10.6	877.385	232152	Aeruginosin 878B	Aeruginosin	Silver	130.0674;310.6430;319.6246;332.6620;347.6576;360.1812;369.1585;375.1677;390.1648;417.1883;425.7008;430.6939;439.6982;749.3318
6.2	1087.54	22180302	New anabaenopeptin 1087	Anabaenopeptin	Bronze	136.0745;202.1222;207.1483;215.1392;255.1080;265.1188;272.1344;342.1850;348.1867;369.1883;389.7213;398.7266;463.2479;466.2608;471.2527;521.7708;530.7822;544.7797;572.2943;683.3627;925.4866;1028.5185;1043.5290;1046.5320;1060.5546;1070.5399;1071.5245;
7	836.455	16504941	Anabaenopeptin B	Anabaenopeptin	Gold	107.0503;112.0882;114.0565;120.0822;129.8490;150.0941;175.1231;330.6962;362.7112;405.2381;419.2351;476.2619;575.3310;660.3850;752.4104
6.9	808.448	10565789	Anabaenopeptin C	Anabaenopeptin	Silver	84.0814;107.0506;114.0567;120.0825;129.1044;150.0943;231.1503;232.1666;258.1461;373.2258;391.2349;405.2326;547.3245;550.3054;632.3786
12.2	874.497	7.70313e+06	Mozamide B	Anabaenopeptin	Silver	86.0973;120.0797;183.1488;187.1444;211.1438;215.1390;231.1127;268.1653;344.1967;379.7152;387.2388;415.2333;581.3661;645.3388;728.4334;776.4346
7	822.464	5.19307e+06	New anabaenopeptin 822	Anabaenopeptin	Bronze	84.0810;161.1279;187.1076;231.1491;233.1280;246.1811;263.1387;272.1603;362.2071;403.2376;460.2910;550.3072;635.3544;637.3701;823.4707
12.2	896.477	1.50034e+06	New anabaenopeptin 896	Anabaenopeptin	Bronze	211.1441;268.1655;387.2393;415.2345;435.2374;442.6987;645.3405;663.3522;853.4584;869.4675;875.5033;879.4741;884.3901;897.4819;897.7686
7.3	850.471	850698	Anabaenopeptin E/F	Anabaenopeptin	Gold	107.0506;114.0567;120.0825;158.0920;175.1188;201.0979;201.0979;201.1118;201.2301;201.2396;231.1492;263.1395;376.2242;474.3078;623.3919;651.3858;851.4762;851.7536
6.4	852.45	752315	New anabaenopeptin 852	Anabaenopeptin	Bronze	150.0911;175.1193;201.0986;203.1179;279.1349;329.6879;338.6932;404.2295;412.2302;413.2344;418.2271;427.2325;575.3305;658.3686;676.3790
7.7	820.461	281141	Anabaenopeptin 820	Anabaenopeptin	Silver	134.0956;175.1192;201.0981;247.1444;330.6949;354.7134;368.7108;397.2400;411.2372;476.2635;575.3292;660.3815;736.4161
3.7	627.274	4281807	New prenylagaramide 628	Prenylagaramides	Silver	83.0501;85.0293;97.0662;101.0612;106.0515;111.0460;111.0823;113.0616;115.0772;157.0848;162.0753;171.0646;171.1010;189.0754;189.1118;205.1069;252.1079;294.1184;294.1546;308.1342;377.1802;440.1755;496.2017;628.2805
4.2	756.317	675662	New prenylagaramide 756	Prenylagaramides	Bronze	157.0859;171.0653;189.0762;189.1127;205.1079;217.0827;235.0933;259.0931;291.1198;363.1405;377.1818;381.1517;569.2200;625.2465;757.3259
8.3	1031.49	5293058	Oscillapeptilide 97-A	Cyanopeptolin	Silver	86.0976;112.0774;140.0715;268.1289;344.1614;346.1758;351.1662;389.1809;428.2152;493.7474;502.7569;516.7541;716.3383;737.3838;865.4435
8.3	1102.42	1.32503e+06	New cyanopeptolin 1102	Cyanopeptolin	Bronze	112.0776;150.0935;309.1813;465.1690;496.1777;523.2008;543.2110;552.7202;553.1053;553.7180;554.1701;556.1693;582.1647;584.1657;754.2341
11.5	1072.88	931315	Aeruginopeptin 917S-A	Cyanopeptolin	Silver	171.1129;185.0924;205.1185;240.1346;254.1499;271.1408;300.1519;302.1715;401.2393;527.3190;1073.6036;1073.7506;1073.8901;1074.0362;1074.1767
6.9	944.404	601582	Micropeptin SD 944	Cyanopeptolin	Silver	184.0525;194.0927;197.0925;212.1035;372.1592;380.1358;389.1827;390.1203;408.1304;540.1884;557.2157;585.2095;796.3047;909.3879;927.3996
8.5	1069.46	581509	Anabaenopeptilide 202-B	Cyanopeptolin	Silver	112.0747;140.0697;150.0904;157.0960;169.0965;184.0525;186.0487;197.0927;212.1030;238.1176;240.1339;268.1298;351.1658;519.7370;533.7346
8.8	1105.45	428185	Micropeptin 1106	Cyanopeptolin	Silver	268.1291;295.0617;351.1662;369.1760;390.1188;408.1297;500.2498;528.2449;585.2084;781.3301;799.3390;1066.4624;1093.3600;1101.9308;1106.4554
8.4	1051.44	421258	New Cyanopeptolin 1051	Cyanopeptolin	Bronze	86.0974;107.0510;112.0776;140.0735;150.0944;268.1297;343.1634;351.1668;372.1599;493.7472;502.7577;503.2584;516.7556;737.3864;865.4448
8.8	1083.47	267758	New Cyanopeptolin 1083	Cyanopeptolin	Bronze	86.0966;107.0504;112.0770;124.0772;133.0666;140.0727;150.0934;157.1000;268.1293;351.1661;369.1769;390.1196;408.1299;500.2501;510.7251;519.7376;533.7346;750.3050;899.4041
8.3	1049.51	263057	Anabaenopeptilide 202-A	Cyanopeptolin	Silver	86.0968;107.0505;112.0772;124.0774;140.0729;150.0900;197.0917;238.1235;268.1290;343.1625;351.1658;369.1740;372.1594;493.7461;502.7565;503.2579;507.7480;516.7540;737.3853;865.4428
7	1041.46	156058	Micropeptin HU1041	Cyanopeptolin	Silver	169.0973;179.0817;184.0526;226.1189;284.1032;309.1558;327.1662;341.6633;343.1407;408.1310;456.1879;486.2357;498.7326;503.7245;512.7297
9.7	1030.51	14650682	[Dha7] Mcyst-YR	Microcystin	Silver	103.0557;105.0714;107.0871;117.0716;127.0886;135.0831;155.0829;163.1131;213.0871;265.1587;329.1934;426.2099;449.2266;500.2515;606.2998;717.3560;825.4619;869.4515;897.4459
7	1023.45	2.32644e+06	[Asp3]Mcyst-RR	Microcystin	Silver	169.0975;179.0808;184.0518;186.0495;226.1194;309.1563;456.1889;498.7329;512.7297
9.8	1083.42	2.02752e+06	New microcystin 1083	Microcystin	Bronze	135.0785;321.6060;339.1055;365.1000;367.1007;382.1268;453.1832;475.6801;520.7221;528.2088;542.7186;544.2194;950.3534
9.7	1016.5	1.17953e+06	(Asp3,Dha7)Mcyst-YR	Microcystin	Silver	103.0557;105.0715;107.0872;117.0718;135.0809;163.1115;265.1583;297.1667;315.1762;340.2084;412.1923;442.2166;442.2171;493.2406;592.2810;703.3398;721.3239;855.4337;883.4270
9.7	1069.41	668172	New microcystin 1069	Microcystin	Bronze	103.0556;105.0713;117.0716;135.0823;314.6006;325.0922;351.0868;353.0863;368.1136;394.1273;446.6800;468.6748;536.9084;537.7162;936.3409
9.9	1044.53	645200	Mcyst-YR	Microcystin	Gold	135.0798;163.1110;213.0858;265.1581;329.1928;343.1720;426.2085;456.2332;506.3312;507.2560;537.2762;555.2508;620.3147;883.4650;911.4592
9.1	1151.53	556298	New microcystin 1151	Microcystin	Bronze	103.0559;105.0714;135.0803;169.0962;184.0515;186.0486;205.0636;213.0871;265.1582;282.1844;343.1727;509.7360;523.2605;547.2300;560.7587;576.7721;676.2722;741.3606;838.3762;1018.4648
9.1	1337.6	467076	New microcystin 1337	Microcystin	Bronze	135.0793;163.1116;213.0870;232.0962;282.1859;523.2616;538.2472;602.7666;605.2837;653.7929;654.2934;669.8042;1075.4857;1186.5140;1204.5258
9.6	1048.53	409366	Mcyst-(H4)YR	Microcystin	Silver	135.0794;163.1111;213.0862;231.0971;265.1588;343.1714;347.2026;444.2203;449.2258;458.2313;506.3321;509.2537;523.2618;573.2618;915.4554
10	1462.61	5775298	Unknown 1462	Unknown	_	159.0918;186.9182;216.1136;244.1077;296.1348;345.1554;360.1540;826.3688;1435.6255;1436.6325;1445.6107;1463.6181;1463.9950;1464.1387;1464.1988;1464.2364;1464.3346;1464.5717;1465.5721;1465.9774
12.2	930.415	2.44543e+06	Unknown 930	Unknown	_	293.6113;324.1279;328.1582;338.1242;346.1408;362.6589;421.1233;421.1699;442.6977;443.1555;444.2002;457.2083;464.7151;466.2129;471.1557
12.2	927.41	2109478	Unknown 927	Unknown	_	86.0972;120.0826;324.1272;328.1577;420.1900;421.1695;428.7016;441.6954;442.7006;443.1553;444.1997;455.7065;464.7151;466.2124;471.1506
10.6	892.35	1.24395e+06	Unknown 892	Unknown	_	130.0636;159.0908;170.0595;319.6335;356.6415;372.1249;395.1575;397.1530;398.1489;400.1191;416.6751;423.1539;447.5981;448.6821;638.2582
8.8	1136.38	1.014e+06	Unknown 1136	Unknown	_	112.0777;169.0962;184.0515;186.0486;343.1406;351.1653;407.0834;540.1831;556.1698;560.1884;569.6988;570.1132;570.6974;584.1641;697.2138;754.2315
10.6	895.358	780888	Unknown 896	Unknown	_	130.0642;159.0917;170.0600;356.6423;372.1252;395.1590;397.1530;398.1489;400.1190;416.6751;423.1532;447.1875;447.6849;448.6830;450.6818
14.5	578.285	617238	Unknown 578	Unknown	_	245.0780;294.1000;301.1411;301.1585;301.3035;301.3134;301.5492;301.5661;301.5724;319.1518;342.1675;437.2075;560.3619;578.3725
12.2	912.444	345372	Unknown 912	Unknown	_	319.1742;347.6842;360.6839;364.6758;371.6831;378.6740;392.7062;406.7049;421.2169;426.2093;434.2248;435.2145;443.2310;448.2225;457.2273
10.6	839.44	237607	Unknown 839	Unknown	_	86.0974;104.0543;155.0805;159.0906;187.0863;240.1706;244.1083;268.1655;318.1268;339.2386;342.6780;367.2339;375.1477;498.2741;610.3344;709.4010;741.3746
9.5	1838.96	222558	Unknown 1838	Unknown	_	135.0791;263.1388;362.2064;589.3141;635.3541;637.3684;663.3492;809.4545;821.4538;853.4474;904.9729;920.4828;1025.5351;1159.6050;1177.6143
